# Supplementary material for: Overexpression of chaperonin containing TCP1 subunit 7 has diagnostic and prognostic value for hepatocellular carcinoma
Source: Aging (Albany NY). 2022 Jan 24;14(2):747–69. doi: 10.18632/aging.203809 (PMC8833116; doi:10.18632/aging.203809)
Supplement: Supplementary Table 1 [file aging-14-203809-s002.xlsx]

## Sheet: Supplementary Table 1
Supplementary Table 1. The most significant survival-related genes in HCC in the GEPIA database.
Gene Symbol	P-Value (Survival OS)
HILPDA	7.6e-09
CCDC58	5.58e-08
B3GAT3	2.3e-07
CLEC3B	2.43e-07
CTB-147N14.6	2.55e-07
SOCS2	9.17e-07
LPCAT1	1.25e-06
PES1	1.79e-06
DNASE1L3	1.87e-06
AHSA1	1.92e-06
RP11-286H15.1	2.25e-06
SAC3D1	2.34e-06
SEC61G	2.93e-06
RP11-295D4.1	2.97e-06
RHPN1-AS1	3.65e-06
MTCH1	3.69e-06
PTTG1	3.79e-06
SAMD13	3.88e-06
CDC20	4e-06
RPUSD3	4.24e-06
SLC41A3	4.36e-06
STEAP1B	5.18e-06
CCDC137	5.63e-06
MED19	6.11e-06
SNRPEP2	6.86e-06
LINC01134	6.98e-06
NRAV	7.04e-06
TMEM185B	7.08e-06
HM13	7.14e-06
NAP1L1P1	7.58e-06
CELSR3	7.68e-06
GNL2	8.47e-06
EIF2S2	9.41e-06
GPSM2	9.64e-06
TIMM23	9.85e-06
PPM1G	9.89e-06
BTNL9	1e-05
SLC29A3	1.01e-05
KIF2C	1.08e-05
MPV17	1.1e-05
SCML2	1.22e-05
TMEM251	1.22e-05
MUTYH	1.3e-05
EIF2B5	1.34e-05
LRRC41	1.41e-05
ATP1B3	1.42e-05
UQCRH	1.43e-05
RAB42	1.43e-05
DTYMK	1.44e-05
PIGU	1.44e-05
FAM189B	1.45e-05
ZNF576	1.51e-05
RRP12	1.54e-05
TAF3	1.63e-05
GARS	1.69e-05
XPO5	1.69e-05
ERGIC3	1.72e-05
CLTA	1.77e-05
SLC16A3	1.8e-05
KIFC1	1.98e-05
EIF5B	2.15e-05
CMB9-22P13.1	2.21e-05
TRPC4AP	2.24e-05
GAPDH	2.27e-05
CCT3	2.32e-05
BRK1	2.32e-05
CDC42EP2	2.34e-05
TMEM106C	2.57e-05
POLR2L	2.64e-05
UBE2S	2.78e-05
COMMD3	2.79e-05
PPP1R14B	2.92e-05
MRPL11	2.94e-05
SLC11A1	3e-05
CHEK1	3.03e-05
SRD5A3	3.11e-05
UCK2	3.17e-05
MKLN1-AS	3.35e-05
RP5-864K19.4	3.43e-05
KRBA1	3.45e-05
TMEM147	3.55e-05
CTC-297N7.9	3.57e-05
HCFC1	3.63e-05
ILKAP	3.64e-05
AGTRAP	3.64e-05
MAPKAPK5-AS1	3.7e-05
NKX3-2	3.75e-05
UPF3B	3.77e-05
RRP8	4.16e-05
ABCC5	4.22e-05
C4orf47	4.23e-05
CDKN2C	4.26e-05
CCT4	4.37e-05
NUP37	4.42e-05
RAB24	4.45e-05
MED10	4.56e-05
MIR210HG	4.58e-05
SLC1A5	4.67e-05
SMS	4.7e-05
AP001469.9	4.7e-05
CCDC167	4.78e-05
ACOT8	4.79e-05
TM2D1	4.81e-05
SNRPGP2	4.82e-05
HEXB	4.83e-05
ERI3	5.04e-05
PPIL1	5.13e-05
EZH2	5.25e-05
RP11-810P12.7	5.3e-05
ABCF3	5.55e-05
ACOT7	5.56e-05
RNF8	5.58e-05
ARHGEF39	5.61e-05
NUP205	5.76e-05
YBX1	5.78e-05
NAP1L4	5.86e-05
KPNA2	5.88e-05
FABP5P7	5.88e-05
2021-03-02	5.92e-05
GTF3C2	5.97e-05
YIF1B	6.16e-05
MTMR2	6.23e-05
PTDSS2	6.28e-05
G6PD	6.64e-05
FAM127B	6.75e-05
BIRC5	6.93e-05
SLC9A3R1	7.29e-05
CDC25C	7.39e-05
STK39	7.4e-05
PRR13	7.42e-05
ZNF691	7.49e-05
MRTO4	7.49e-05
VOPP1	7.64e-05
CDCA2	7.69e-05
E2F2	7.71e-05
CMSS1	7.76e-05
DYNC1LI1	7.94e-05
SPC25	7.99e-05
FKBP4	8.02e-05
RANBP1	8.06e-05
LCAT	8.15e-05
DYNLL1	8.16e-05
CEBPZOS	8.33e-05
UBE2E1	8.42e-05
RP11-421M1.8	8.45e-05
RP11-669E14.4	8.48e-05
SF3B4	8.48e-05
THAP2	8.54e-05
FTH1P11	8.59e-05
ADAMTS5	8.63e-05
ATP5G1P4	8.64e-05
TUBA1C	8.81e-05
C3orf35	8.86e-05
BCL10	8.93e-05
PRAF2	8.94e-05
ZNF37BP	9.11e-05
TMCO3	9.15e-05
RP11-620J15.3	9.67e-05
LL22NC03-80A10.6	9.74e-05
TP53RK	9.75e-05
RP9P	9.77e-05
POLR3C	9.81e-05
SMG5	9.98e-05
RDM1	9.98e-05
GP6	9.99e-05
MSANTD3	0.0001
TXNL4A	0.000101
RP11-258F1.2	0.000101
SPP1	0.000102
DHX34	0.000103
SNRPD1	0.000103
BRD8	0.000103
C20orf27	0.000103
CCL14	0.000104
NAT9	0.000104
DDX56	0.000106
MAMSTR	0.000108
MED8	0.000109
ADH4	0.000111
NUP85	0.000114
CCDC34	0.000118
GNG5	0.000118
CFHR4	0.000121
NOP58	0.000122
ITGB1BP1	0.000124
ARMC10	0.000127
METTL18	0.000128
TMEM115	0.00013
ADAM12	0.00013
NEIL3	0.000132
SLC16A11	0.000133
LINC00152	0.000137
RP4-734G22.3	0.000138
PARD3	0.000141
ZFPL1	0.000141
ACYP1	0.000141
ZNF133	0.000143
HAUS6	0.000144
MYPOP	0.000144
SLC52A2	0.000145
N4BP3	0.000146
ARF4	0.000146
BAMBI	0.00015
NUP155	0.00015
TMEM237	0.000152
AC083899.3	0.000152
FAM50A	0.000153
POLR2G	0.000154
CCT7	0.000157
PCAT6	0.000158
SEC61A1	0.000161
RP11-641D5.1	0.000162
CCNB1	0.000165
FTSJ1	0.000166
RP11-165F24.2	0.000166
DUSP12	0.000166
CDK1	0.000167
ATP6V0D2	0.000168
TTYH3	0.000169
HDAC2	0.00017
MYL6B	0.00017
ILF2	0.000171
LSM5	0.000171
HEATR5A	0.000172
RNF145	0.000173
C16orf59	0.000174
EWSR1	0.000175
CHORDC1	0.000176
LL22NC03-N14H11.1	0.000178
SGOL1	0.000179
SRSF9	0.000182
AC009005.2	0.000187
CD58	0.000187
C20orf24	0.000189
TRIP13	0.00019
DHDH	0.000191
FAM24B	0.000192
SH3GLB1	0.000192
ISY1	0.000195
SNHG3	0.000195
NUF2	0.000195
MMP10	0.000197
ANAPC1	0.000203
DDX11	0.000203
VPS45	0.000205
ACKR1	0.000205
RAMP3	0.000206
PGBD1	0.000206
SNRPE	0.000209
UPB1	0.000209
CDCA5	0.00021
CBX1	0.000212
MAPKAPK5	0.000216
MCM8	0.000217
LLPH	0.000218
REXO4	0.000219
ADRA2B	0.000219
ZNF239	0.00022
CFHR3	0.000221
LINC01554	0.000223
E2F8	0.000224
UBE2D2	0.000225
NDC1	0.000225
RAD54L	0.000227
CBX2	0.000229
CLIC1	0.00023
E2F5	0.00023
INPP5F	0.000232
MMP1	0.000232
PPHLN1	0.000232
AURKA	0.000233
NCBP2	0.000235
WDR4	0.000236
SGOL2	0.000236
PRMT3	0.000236
WDR77	0.000237
RP11-1000B6.7	0.000237
BACE1-AS	0.000238
RP11-307C12.11	0.00024
CENPI	0.000245
RAN	0.000246
AGPS	0.000246
XCR1	0.000246
SSR3	0.000246
ZNF516	0.000246
RP11-3P17.5	0.000247
TOP2B	0.000247
GPATCH4	0.000251
KTI12	0.000256
METTL5	0.000257
TICRR	0.000257
TMEM234	0.00026
VPS72	0.00026
APOPT1	0.000261
LRRC42	0.000263
OLA1P1	0.000264
THAP3	0.000266
VN1R108P	0.000268
SLC30A6	0.000269
DYNC1H1	0.000271
CSTF2	0.000273
CDCA8	0.000274
IER3	0.000276
ARMC7	0.000277
UBLCP1	0.000277
GEMIN2	0.000277
ATIC	0.000278
TPRXL	0.000279
TARS	0.00028
NEK2	0.000281
PRR19	0.000281
GRIN2D	0.000284
RP11-79P5.10	0.000284
RP11-286H14.4	0.000284
ERP29	0.000285
SRL	0.000286
CTB-193M12.5	0.000287
PSMD13	0.000288
NEU1	0.000288
COPRS	0.00029
MKLN1	0.000292
RP11-817I4.2	0.000292
NABP2	0.000292
SRSF2	0.000293
CTC-459F4.9	0.000294
C20orf196	0.000295
CTD-3138B18.5	0.000295
CPS1	0.000297
MCM3	0.0003
MBOAT7	0.000303
PPP2R1A	0.000303
RP11-159J3.1	0.000306
RTN3	0.000307
MCM7	0.000308
SUPT3H	0.000309
UQCC3	0.00031
AC097662.2	0.000312
MMD	0.000314
RP11-466H18.1	0.000315
UBXN2A	0.000316
CAD	0.000318
EXO1	0.000319
SFPQ	0.000319
AMD1	0.00032
ARHGAP39	0.00032
FANCL	0.00032
AUNIP	0.000322
PHC2	0.000323
HSF2	0.000323
CDC45	0.000324
HMGA1	0.000324
CEP55	0.000325
SLC22A1	0.000325
RP11-783K16.5	0.000326
ZNF408	0.000327
CRNKL1	0.000328
RP11-468E2.6	0.000329
MITD1	0.00033
ESCO2	0.00033
BBS7	0.000332
CCDC134	0.000334
TAF11	0.000334
SMOX	0.000341
C11orf84	0.000343
MRPS15	0.000346
SNRPA	0.000348
CENPQ	0.000349
RBM14	0.000351
ITM2A	0.000353
CNTN6	0.000354
MARCKSL1	0.000354
VPS37C	0.000358
CTD-2083E4.4	0.000358
RP4-798A17.5	0.000359
CDT1	0.00036
RGS20	0.000363
PET117	0.000364
CHCHD2	0.000364
UBAP2L	0.000364
TBX19	0.000368
ERCC1	0.000368
RP11-337N6.3	0.00037
PIFO	0.00037
RP11-403I13.8	0.000372
METTL1	0.000376
KDELR1	0.000377
ZBTB40	0.000379
ANKRD24	0.00038
SEC14L2	0.000386
RBFA	0.000386
RPLP2	0.000387
CYB5D2	0.000389
PRC1	0.000391
RNF24	0.000397
PRDX1	0.000397
IFT20	0.000401
RP11-252E2.2	0.000403
DLGAP5	0.000414
TMED7-TICAM2	0.000415
B4GALT2	0.000417
HN1	0.000417
SF3A3	0.00042
SUPT5H	0.000422
MYLK2	0.000422
RP11-177B4.1	0.000423
PAIP1	0.000426
VPS26A	0.000427
CAPG	0.000428
CBX3	0.00043
TBL1XR1	0.00043
ETV5	0.000432
IMPDH1	0.000433
PLOD2	0.000433
POLD1	0.000435
CENPM	0.000435
APIP	0.000436
CTD-2240J17.1	0.000436
ZNF248	0.000437
ZC2HC1A	0.000437
SLC39A10	0.000439
RP11-884K10.7	0.000443
FFAR3	0.000443
MKI67	0.000445
LARS	0.000446
EIF4A3	0.000448
DLGAP4	0.000448
RP11-295M18.6	0.000448
PSMD1	0.000449
PRPF39	0.000453
MAPT	0.000455
MRGBP	0.000456
RPIA	0.000457
SKA3	0.000458
FAIM	0.000459
LMAN2L	0.000461
FBXO5	0.000462
NME6	0.000465
AP000695.4	0.000465
FAM27E3	0.000467
B4GALT5	0.000468
USP39	0.000469
COA4	0.00047
EHMT2	0.000472
TUBG1	0.000474
DENND5A	0.000475
RARS	0.000475
CENPBD1P1	0.000477
NCDN	0.000478
MCM10	0.000478
OIP5	0.000478
AC116035.1	0.000479
ZNF789	0.000479
NUTM2B-AS1	0.000482
WDHD1	0.000482
SNX7	0.000486
DANCR	0.000486
HOXD9	0.000486
XRCC3	0.000488
MRPL36	0.000491
TOMM34	0.000493
CEBPZ	0.000494
TTLL1	0.000498
DDOST	0.000498
AP5Z1	0.000504
TCF21	0.000509
RAB35	0.000509
GNAI3	0.000513
MRPL35	0.000514
H2AFZ	0.000516
RNFT2	0.000516
POLR3D	0.000517
GYS2	0.000518
C19orf48	0.000525
TTLL4	0.000526
APRT	0.000527
C8B	0.000527
DNAJB2	0.000531
ELOVL1	0.000532
ENO1	0.000533
AC012065.1	0.000533
TMEM79	0.000534
PPIH	0.000535
LINC01268	0.000535
SNRPB2	0.000535
LINC01296	0.000541
ANXA10	0.000543
FHL3	0.000545
TARDBP	0.000546
APLP2	0.000548
PDSS1	0.000549
CES3	0.000552
FBXO30	0.000559
RP11-98G7.1	0.000563
TMEM14C	0.000565
ERCC6L	0.000565
CHMP3	0.000566
ST6GALNAC4	0.000567
BRD9	0.000569
KIF11	0.000572
RCL1	0.000575
